# Supplementary material
Source: publisher figshare collection journal article supplement (https://rs.figshare.com/ndownloader/files/36851423)
Supplement: Supplementary file 1 [file 36851423]

## Sheet: Sheet1
Table S6: Percent of times that a model had the high Akaike model weight across the posterior distribution of trees from Alencar et al. 2016.
Model	Percent_Top_Model
HL	0
HL+Temp	0.00826446
HL+Temp+Mammal	0.53719
HL+Temp+Amphib	0.0661157
HL+Temp+Dangerous	0.14876
HL+Temp+dietPC1	0.0247934
HL+Temp+dietPC2	0.0165289
HL+Temp+Fluffy	0.123967
HL+Temp+Reptile	0.0413223
HL+Temp+Soft	0.0247934
